# Supplementary material for: Fascicle localisation within peripheral nerves through evoked activity recordings: A comparison between electrical impedance tomography and multi-electrode arrays
Source: PubMed Central journal article supplement (PMC8249910; doi:10.1016/j.jneumeth.2021.109140), 2021-07-01
Supplement: mmc1.pdf [file mmc1.pdf]

**Supplemental Table S.T1** – Centre-of-Mass (CoM) coordinates for every nerve analysed and for each measurement technique. Values are reported in microns according to the coordinates system defined in Figure 5 of the main manuscript. Hind leg for every animal is marked as L/R for left/right. Fascicle from which neural activity is evoked is marked as T/P for Tibial/Peroneal. EIT = Electrical Impedance Tomography; CF = carbon fibre; SS = silicon shank.

| Nerve | Animal | Hind leg | Fascicle | EIT                |                    | CF                 | SS                 |                    | MicroCT            |                    |
|-------|--------|----------|----------|--------------------|--------------------|--------------------|--------------------|--------------------|--------------------|--------------------|
|       |        |          |          | Y( $\mu\text{m}$ ) | Z( $\mu\text{m}$ ) | Y( $\mu\text{m}$ ) | Y( $\mu\text{m}$ ) | Z( $\mu\text{m}$ ) | Y( $\mu\text{m}$ ) | Z( $\mu\text{m}$ ) |
| #1    | #1     | L        | T        | 112                | -235               | 138                | 143                | -126               | 163                | -94                |
|       |        |          | P        | -106               | 192                | -300               | -154               | -70                | -265               | 303                |
| #2    | #2     | L        | T        | -134               | -149               | 196                | 3                  | -9                 | 207                | 62                 |
|       |        |          | P        | 19                 | 245                | -290               | -74                | -57                | -337               | 293                |
| #3    | #2     | R        | T        | 20                 | -52                | -118               | -56                | -14                | 224                | -65                |
|       |        |          | P        | -126               | 213                | 252                | -19                | 26                 | -442               | -166               |
| #4    | #3     | L        | T        | -237               | 8                  | 11                 | -27                | -3                 | -226               | -108               |
|       |        |          | P        | 91                 | -161               | 92                 | -16                | 0                  | 321                | 230                |
| #5    | #3     | R        | T        | 220                | -33                | -9                 | -56                | -9                 | -240               | -36                |
|       |        |          | P        | -174               | -220               | 81                 | -18                | 33                 | 352                | 187                |

**Supplemental Table S.T2** – Values of the distance between fascicles computed for each nerve in the dataset according to Section 2.7 of the main document. Values are expressed in microns, with mean  $\pm$  1 standard deviation (SD) for each group. Values for the CF group are corrected as explained in the main manuscript.

| Nerve                         | EIT ( $\mu\text{m}$ ) | CF (corrected) ( $\mu\text{m}$ ) | SS ( $\mu\text{m}$ ) | MicroCT ( $\mu\text{m}$ ) |
|-------------------------------|-----------------------|----------------------------------|----------------------|---------------------------|
| #1                            | 480                   | 619                              | 303                  | 583                       |
| #2                            | 423                   | 688                              | 91                   | 591                       |
| #3                            | 303                   | 523                              | 54                   | 674                       |
| #4                            | 369                   | 113                              | 11                   | 643                       |
| #5                            | 436                   | 126                              | 57                   | 633                       |
| <b>Mean<math>\pm</math>SD</b> | 402 $\pm$ 68          | 414 $\pm$ 275                    | 103 $\pm$ 115        | 625 $\pm$ 38              |

**Supplemental Table S.T3** – Updated CoM values from supplemental Table S.1 after performing the clusterization procedure reported in Section 2.7 of the main manuscript. For each nerve, the rotation angle that minimizes intra-group scatter is reported.

| Nerve | Fasc. | EIT                |                    |                   | CF                 |               | SS                 |                    |                   | MicroCT            |                    |                   |
|-------|-------|--------------------|--------------------|-------------------|--------------------|---------------|--------------------|--------------------|-------------------|--------------------|--------------------|-------------------|
|       |       | Y( $\mu\text{m}$ ) | Z( $\mu\text{m}$ ) | Rot. ( $^\circ$ ) | Y( $\mu\text{m}$ ) | Rot. $^\circ$ | Y( $\mu\text{m}$ ) | Z( $\mu\text{m}$ ) | Rot. ( $^\circ$ ) | Y( $\mu\text{m}$ ) | Z( $\mu\text{m}$ ) | Rot. ( $^\circ$ ) |
| #1    | T     | 112                | -235               | 0                 | 138                | 0             | 143                | -126               | 0                 | 163                | -94                | 0                 |
|       | P     | -106               | 192                |                   | -300               |               | -154               | -70                |                   | -265               | 303                |                   |
| #2    | T     | 11                 | -200               | 45                | 196                | 0             | 2                  | -10                | -10               | 212                | 43                 | -5                |
|       | P     | -160               | 187                |                   | -290               |               | -83                | -43                |                   | -310               | 321                |                   |
| #3    | T     | 29                 | -48                | 10                | 118                | 180           | 32                 | -47                | 110               | 56                 | -226               | -60               |
|       | P     | -161               | 188                |                   | -252               |               | -18                | -26                |                   | -365               | 300                |                   |
| #4    | T     | 201                | -126               | 150               | -11                | 180           | 5                  | -26                | 95                | 145                | -203               | 100               |
|       | P     | 2                  | 185                |                   | -92                |               | 2                  | -16                |                   | -282               | 276                |                   |
| #5    | T     | -52                | -216               | -95               | 9                  | 180           | 32                 | -47                | 115               | 116                | -213               | 110               |
|       | P     | -204               | 192                |                   | -81                |               | -22                | -30                |                   | -297               | 267                |                   |

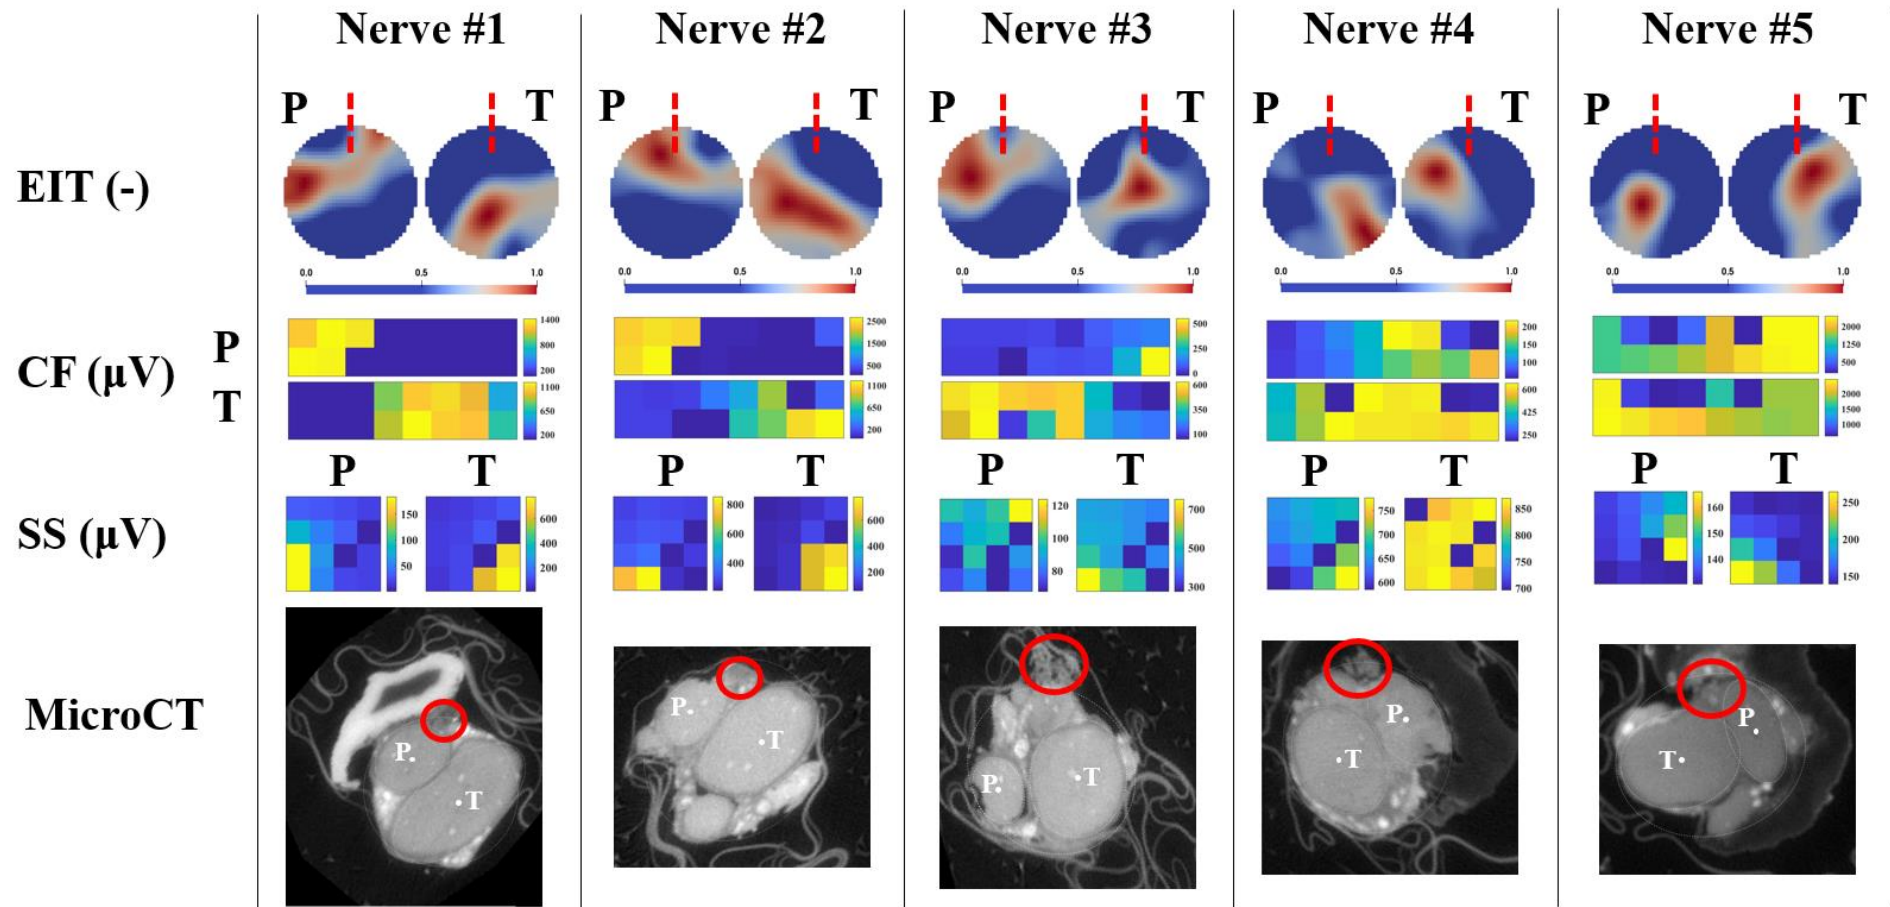

**Supplemental Figure S.1** – Images from EIT, MEA and microCT from all five nerves. EIT: the individual images of evoked fascicular activity reconstructed from EIT recordings for the tibial (T) and peroneal (P) fascicles, respectively. The range of values for every image was normalised between 0 and 1 and the rainbow colour scale is showing the top 50% of colour for each image i.e. full width at half maximum (FWHM) intensity scaling. Cuff opening position is marked by dotted red lines. CF: voltage recordings from carbon fibre probes expressed in  $\mu\text{V}$ . Each pixel correspond to a recording site in the 8x2 electrode configuration described in the main document. SS: voltage recordings from silicon shank probes expressed in  $\mu\text{V}$ . Each pixel correspond to a recording site in the 4x4 electrode configuration described in the main document. MicroCT: representative slice of the microCT scan of the nerve in the area corresponding to EIT/MEA recordings with fascicles clearly visible. Snippets of the silk thread marking the EIT cuff opening area are highlighted with red circles. All EIT/microCT images were rotated so that the electrode cuff opening was at 12 o'clock. The external boundaries of the nerve were fitted to a circular profile after rigid deformation. Each fascicle was fitted into an ellipsoid profile (dashed white line) with a CoM (white dot in the middle) which was further used as a ground truth coordinate in the study.
